# Supplementary material
Source: HighWire-hosted journal article supplement (https://ebm.bmj.com/content/27/3/169)
Supplement: inline-supplementary-material-1 [file inline-supplementary-material-1.pdf]

### Search strategies

#### PubMed 10/06/2021

Search: 2019 novel coronavirus disease OR 2019 novel coronavirus infection OR 2019-ncov disease OR 2019-ncov infection OR coronavirus disease 2019 OR coronavirus disease-19 OR coronavirus\* OR coronavirus\* OR coronavirus Infections OR Wuhan coronavirus OR 2019-nCoV OR COVID-19 OR CORVID-19 OR wn co OR novel coronavirus OR new coronavirus OR 2019 novel OR new coronavirus OR ncov OR SARS-CoV-2 OR SARSCov19 OR ncov\* wuhan Filters: Systematic Reviews, from 2020 – 2020

Hits: 317

*When filters removed and combined with*

Search: **"systematic review"[Title] OR "rapid review"[Title] OR overview[Title] OR "evidence synthesis"[Title] OR "evidence review"[Title]**

*0 additional results found*

#### Embase 11/06/2021

Database: Embase <1974 to 2020 June 11>

Search Strategy:

- 
- 1 (exp coronavirus/ or coronavirus\*.ti,ab.) and (wuhan or beijing or shanghai or 2019-nCoV or nCoV or COVID-19 or SARS-CoV-2).ti,ab. (8012)
  - 2 ("COVID-19" or "2019-nCoV" or "SARS-CoV-2").ti,ab. (19071)
  - 3 1 or 2 (19387)
  - 4 systematic.ti. (179292)
  - 5 (meta-analysis or metaanalysis or metasynthesis).ti,ab. (197208)
  - 6 (systematic\* adj2 review\*).ti,ab. (230693)
  - 7 evidence synthesis.ti,ab. (4704)
  - 8 (rapid adj2 review).ti. (563)
  - 9 pubmed.ab. (148658)
  - 10 4 or 5 or 6 or 7 or 8 or 9 (424132)
  - 11 3 and 10 (508)
  - 12 limit 11 to dd=20200101-20200612 (295)

#### Cochrane Database of Systematic Reviews 10/06/2021

COVID\* or coronavirus or "SARS-CoV-2":ti,ab,kw

Hits: 19

#### CINAHL 12/06/2021

Friday, June 12, 2020 6:46:08 AM

| #   | Query                                                                                    | Results |
|-----|------------------------------------------------------------------------------------------|---------|
| S11 | S4 AND S10                                                                               | 69      |
| S10 | S5 OR S6 OR S7 OR S8 OR S9                                                               | 144,400 |
| S9  | TI ( "rapid review" or "evidence review" ) OR AB ( "rapid review" or "evidence review" ) | 1,194   |

|    |                                                                                                                |         |
|----|----------------------------------------------------------------------------------------------------------------|---------|
| S8 | TI ( metaanalysis or meta-analysis or meta analysis ) OR AB ( metaanalysis or meta-analysis or meta analysis ) | 71,522  |
| S7 | TI ( evidence and synthesis ) OR AB ( evidence and synthesis )                                                 | 10,292  |
| S6 | TI systematic review OR AB systematic review                                                                   | 103,888 |
| S5 | (MM "Systematic Review")                                                                                       | 1,662   |
| S4 | S1 OR S2 OR S3                                                                                                 | 5,097   |
| S3 | TI ( wuhan and coronavirus ) OR AB ( wuhan and coronavirus )                                                   | 215     |
| S2 | TI ( covid* or "sars-ncov*" or "sars cov*" or ncov ) OR AB ( covid* or "sars-ncov*" or "sars cov*" or ncov )   | 4,371   |
| S1 | (MM "Coronavirus Infections")                                                                                  | 1,353   |

**Web of Science 15/06/2021**

TI=( covid\* or "sars-ncov\*" or "sars cov\*" or sarscov\* or sarsncov\* or ncov or Coronavirus\* OR coronavirus\*) OR AB=( covid\* or "sars-ncov\*" or "sars cov\*" or sarscov\* or sarsncov\* or ncov or Coronavirus\* OR coronavirus\*)

AND

TI=( metaanalysis or meta-analysis or meta analysis ) OR AB=( metaanalysis or meta-analysis or meta analysis )

TI=( "rapid review" or "evidence review" ) OR AB=( "rapid review" or "evidence review" )

TI=(evidence and synthesis ) OR AB=( evidence and synthesis )

TI=(evidence and systematic\*) OR AB=(evidence and systematic\*)

TI=(overview and synthesis) or AB=(overview and systematic\*)

Hits: 234 but deleted those pre 2019 which left 151

**WHO search 15/06/2021**

1. Review\* or overview\* in title = 874 hits
2. All with systematic review, overview, evidence syntheses and HTA filters = 166 hits
3. Meta analys\* or metaanalys\* in title = 183 hits

Downloaded to separate endnote library and endnote default de-dup run leaving 893 refs which downloaded

**Epistemonikos 10/06/2021**

Epistemonikos COVID-19 evidence, limited to systematic reviews

Hits: 590
